# Supplementary material for: Low threshold lasing from novel thulium-incorporated C(NH2)3PbI3 perovskite thin films in Fabry–Pérot resonator
Source: Royal Society of Chemistry journal article supplement (doi:10.1039/c8tc04697b), 2018-01-01
Supplement: c8tc04697b1.pdf [file c8tc04697b1.pdf]

## Supporting Information

### **Low threshold lasing from novel thulium incorporated $\text{C}(\text{NH}_2)_3\text{PbI}_3$ perovskite thin films in Fabry-Pérot resonator**

*Gowri Manohari Arumugam, Chunxiang Xu\*, Santhosh Kumar Karunakaran, Zengliang Shi, FeifeiQin, Can Zhu, and Feng Chen*

*<sup>a</sup>State Key Laboratory of Bioelectronics, School of Biological Science & Medical Engineering, Southeast University, Nanjing 210096, PR China.*

*<sup>b</sup>Joint International Research Laboratory of Information Display and Visualization, School of Electronic Science & Engineering, Southeast University, Nanjing 210096, PR China.*

*\*E-mail: xcxseu@seu.edu.cn*

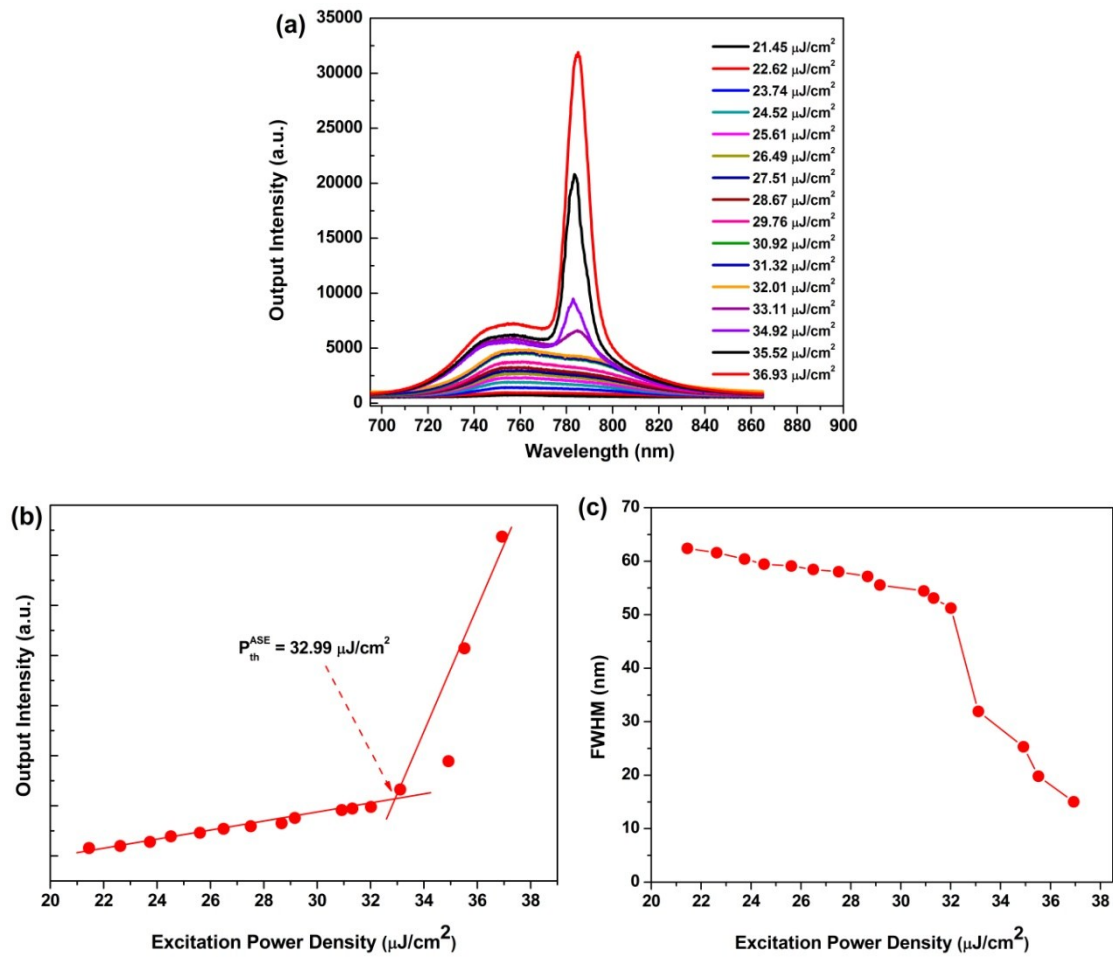

**Fig. S1** (a) ASE spectra for pure GAPbI<sub>3</sub> thin films on glass substrate with various excitation power densities under an excitation wavelength of 532 nm, (b) Variations in output intensities and (c) Variations in FWHM values with respect to excitation power densities.

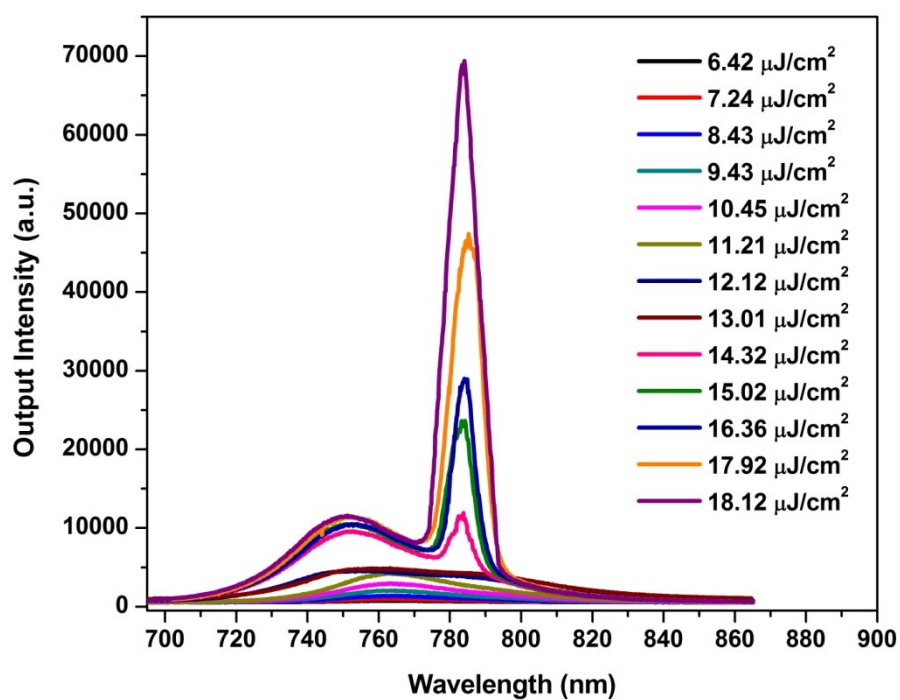

**Fig. S2** (a) ASE spectra for glass/GAPbI<sub>3</sub>:Tm/P3HT with various excitation power densities under an excitation wavelength of 532 nm.

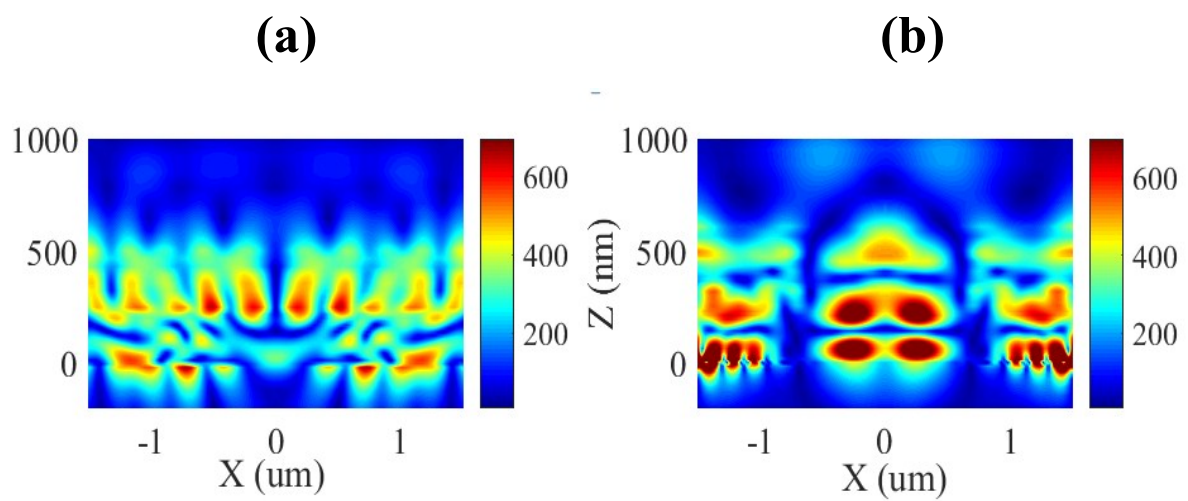

**Fig. S3** Electronic field distributions of F-P resonator with (a) absence and (b) presence of CLC and the intensity has been normalized to 620.
